# Supplementary material for: Floxuridine-loaded silk fibroin nanospheres
Source: Royal Society of Chemistry journal article supplement (doi:10.1039/c4ra02113d), 2014-01-01
Supplement: c4ra02113d1.pdf [file c4ra02113d1.pdf]

## Supporting Information

### Floxuridine-loaded silk fibroin nanospheres

Shuying Yu<sup>a</sup>, Wenhua Yang<sup>a</sup>, Sheng Chen<sup>b</sup>, Mengjie Chen<sup>a</sup>, Yezhuo Liu<sup>c</sup>,  
Zhengzhong Shao<sup>a</sup> and Xin Chen<sup>\*a</sup>

<sup>a</sup> *State Key Laboratory of Molecular Engineering of Polymers, Department of Macromolecular Science, Laboratory of Advanced Materials, Fudan University, Shanghai, 200433, China.. Fax: 86 21 5163 0300; Tel: 86 21 6564 2866; E-mail: chenx@fudan.edu.cn*

<sup>b</sup> *Department of General Surgery, Ruijin Hospital, Shanghai Jiaotong University School of Medicine, Shanghai, 200025, China.*

<sup>c</sup> *Booocle Pharmaceutical Technology Co., Ltd., 1883 South Huicheng Road, Shanghai, 201821, China*

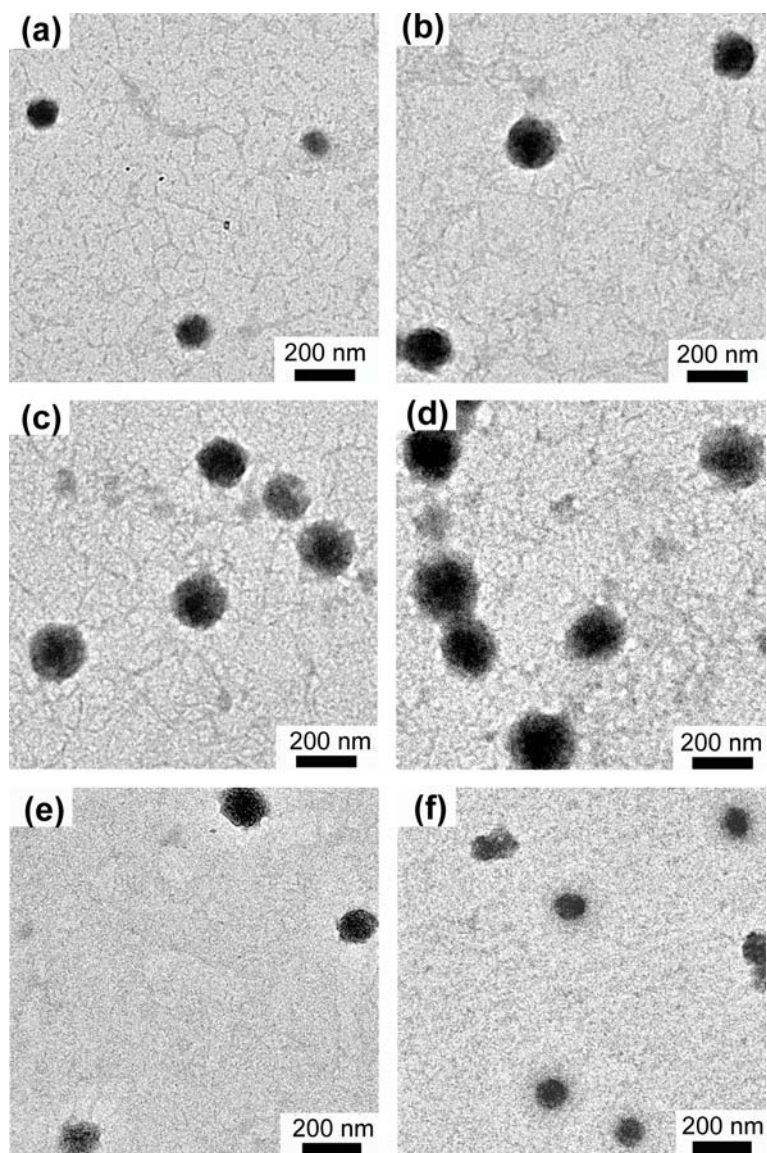

**Fig. S1** TEM images of FUDR-loaded RSF nanospheres. (a) to (f) is from Sample 1 to 6 in Table 1, respectively.

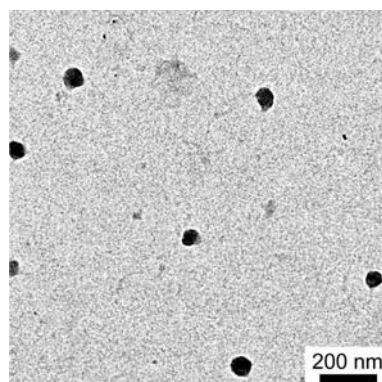

**Fig. S2** TEM image of pristine RSF nanospheres ( $[RSF] = 20\text{mg/mL}$ ).

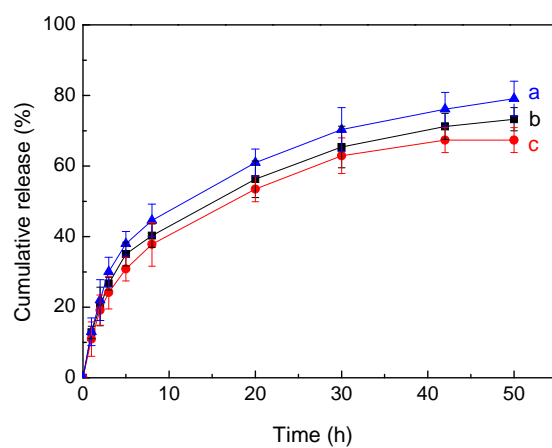

**Fig. S3** *In vitro* drug-release curves of FUDR-loaded RSF nanospheres prepared when [RSF] = 40 mg/mL. (a) FUDR/RSF = 0.375, FUDR loading = 6.8%; (b) FUDR/RSF = 0.25, FUDR loading = 6.0%; (c) FUDR/RSF = 0.1, FUDR loading = 3.7%.
